# Supplementary material for: Multi-Omics Approaches for Freshness Estimation and Detection of Illicit Conservation Treatments in Sea Bass (Dicentrarchus Labrax): Data Fusion Applications
Source: MDPI journal article supplement (doi:10.3390/ijms25031509), 2024-01-26

# Multi-Omics Approaches for Freshness Estimation and Detection of Illicit Conservation Treatments in Sea Bass (*Dicentrarchus Labrax*): Data Fusion Applications

Alessandro Benedetto, Elisa Robotti, Masho Hilawie Belay, Arianna Ghignone, Alessia Fabbris, Eleonora Goggi, Simone Cerruti, Marcello Manfredi, Elettra Barberis, Simone Peletto, Alessandra Arillo, Nunzia Giaccio, Maria Angela Masini, Jessica Brandi, Daniela Cecconi, Emilio Marengo and Paola Brizio

## Supplementary Material S2.

Here are reported the contribution plots of the first two Dimensions calculated for MFA applied to the single sampling sites datasets. Just the first 100 molecules are reported for each graphical representation. In each representation, the variables are on the x-axis, while the contribution is on the y-axis.

### MUSCLE

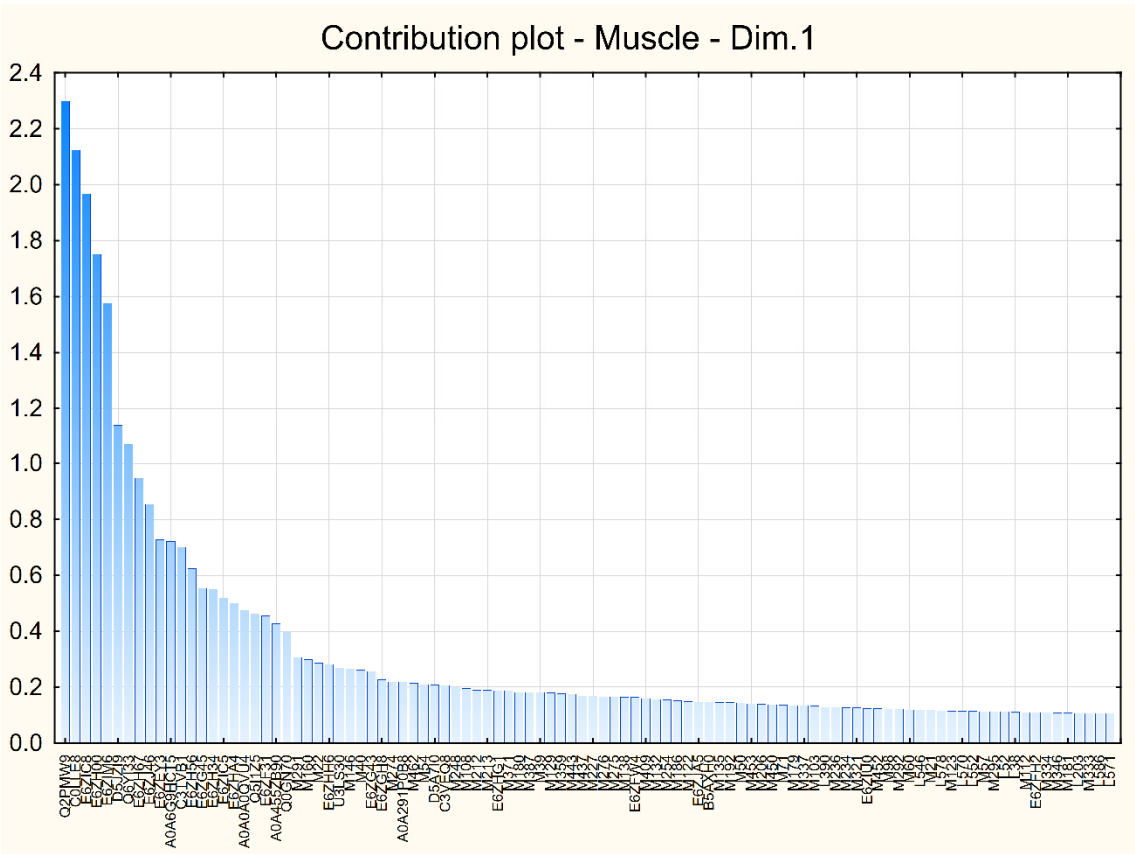





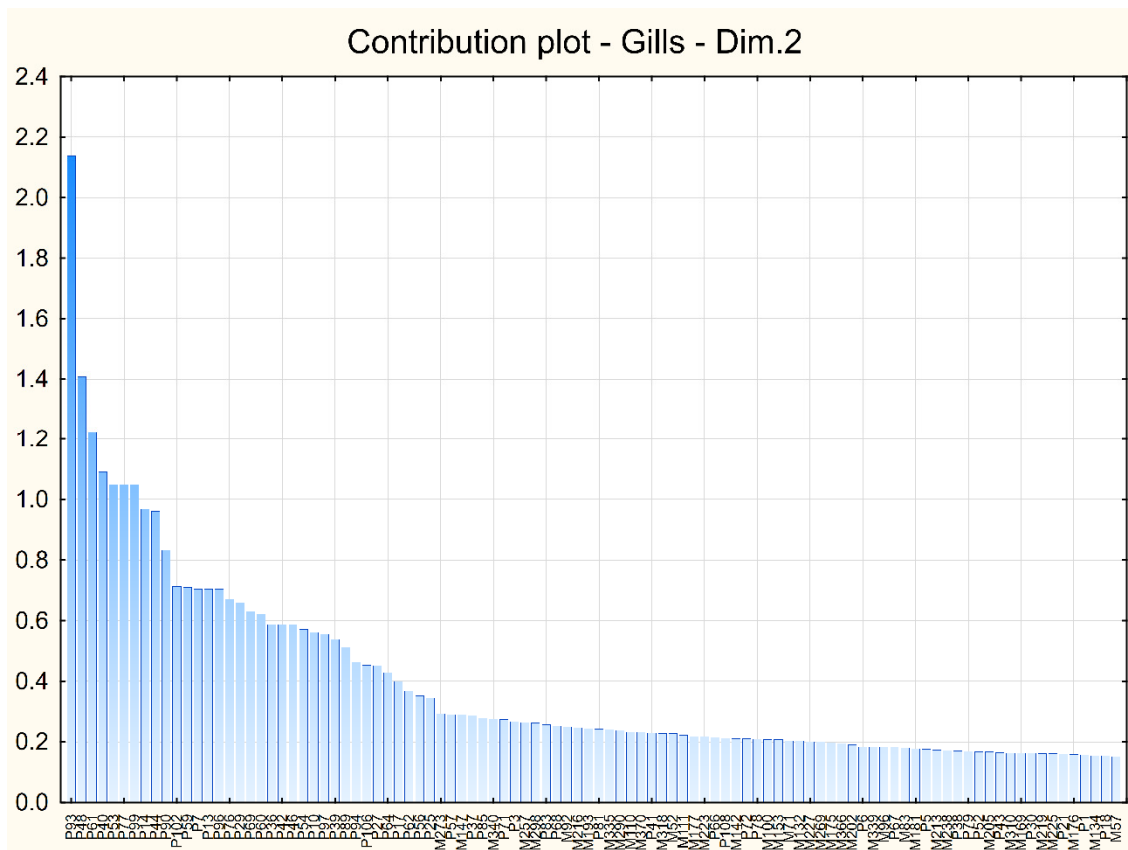

EYE

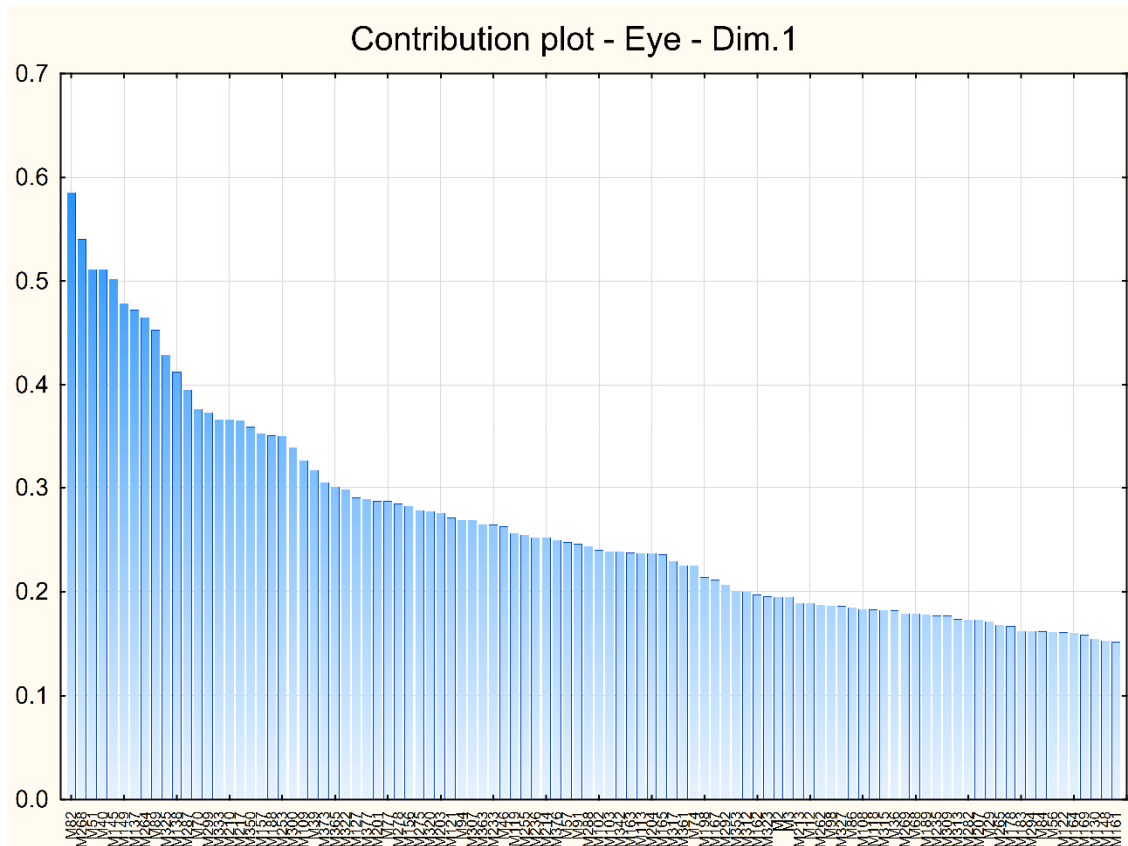

Contribution plot - Eye - Dim.2

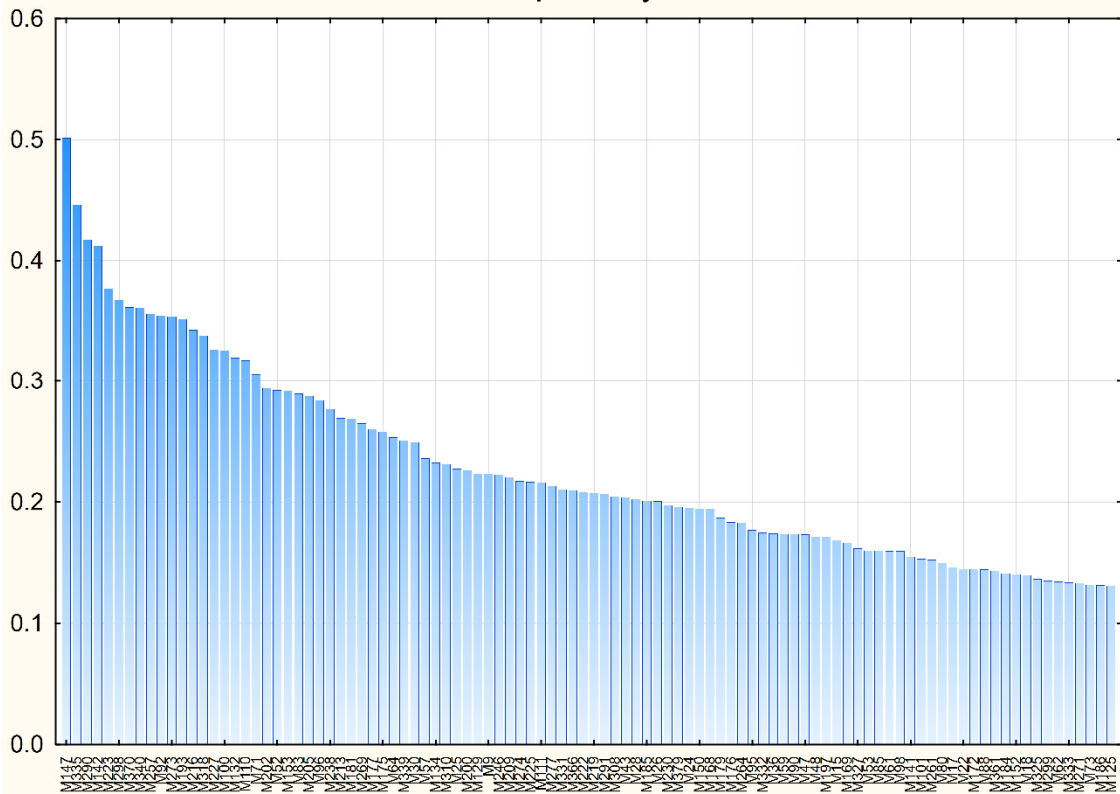

Supplement: s1 [file s1]
