# Supplementary material for: Multi-Omics Approaches for Freshness Estimation and Detection of Illicit Conservation Treatments in Sea Bass (Dicentrarchus Labrax): Data Fusion Applications
Source: MDPI journal article supplement (doi:10.3390/ijms25031509), 2024-01-26
Supplement: s1 [file s1]

# Multi-Omics Approaches for Freshness Estimation and Detection of Illicit Conservation Treatments in Sea Bass (*Dicentrarchus Labrax*): Data Fusion Applications

Alessandro Benedetto, Elisa Robotti, Masho Hilawie Belay, Arianna Ghignone, Alessia Fabbris, Eleonora Goggi, Simone Cerruti, Marcello Manfredi, Elettra Barberis, Simone Peletto, Alessandra Arillo, Nunzia Giaccio, Maria Angela Masini, Jessica Brandi, Daniela Cecconi, Emilio Marengo and Paola Brizio

## Supplementary Material S1.

Here are reported with more details all the results of analysis made on 16S rRNA sequencing data. For material and Methods please refer to section “4.3.4 Metagenomics” of the manuscript.

### *Sample list for metagenomic analysis*

| sample ID | Tissue              | Group            | time point | Number of Reads |
|-----------|---------------------|------------------|------------|-----------------|
| 1         | Gills               | Treated          | t24        | 325112          |
| 2         | Eye                 | Untreated        | t24        | 78444           |
| 3         | Skin                | Treated          | t24        | 499066          |
| 4         | Skin                | Untreated        | t0         | 359096          |
| 5         | Skin                | Treated          | t24        | 567028          |
| 6         | Eye                 | Treated          | t24        | 728582          |
| 7         | Skin                | Untreated        | t24        | 163252          |
| 8         | Control mock sample | Positive Control | /          | 482584          |
| 9         | Gills               | Untreated        | t24        | 175294          |
| 10        | Gills               | Treated          | t0         | 84200           |
| 11        | Skin                | Treated          | t0         | 395243          |
| 12        | Eye                 | Untreated        | t0         | 232086          |
| 13        | Gills               | Untreated        | t0         | 157692          |
| 14        | Skin                | Untreated        | t0         | <10000          |
| 15        | Eye                 | Untreated        | t0         | 310886          |
| 16        | Gills               | Untreated        | t0         | <10000          |
| 17        | Eye                 | Treated          | t0         | 459918          |
| 18        | Skin                | Treated          | t0         | 98822           |
| 19        | Eye                 | Treated          | t0         | 2344202         |
| 20        | Gills               | Treated          | t24        | 146310          |
| 21        | Gills               | Treated          | t24        | 114082          |
| 22        | Eye                 | Untreated        | t24        | 88978           |
| 23        | Skin                | Untreated        | t24        | 175536          |
| 24        | Gills               | Untreated        | t24        | 158080          |
| 25        | Control mock sample | Positive Control | /          | 274506          |
| 26        | Gills               | Treated          | t0         | 158092          |
| 27        | Skin                | Treated          | t0         | 89732           |
| 28        | Skin                | Untreated        | t0         | 50270           |
| 29        | Gills               | Untreated        | t0         | 243996          |
| 30        | Eye                 | Untreated        | t0         | <10000          |
| 31        | Eye                 | Treated          | t0         | 50062           |
| 32        | Skin                | Treated          | t0         | 82332           |
| 33        | Gills               | Treated          | t0         | <10000          |

|    |                         |                  |     |         |
|----|-------------------------|------------------|-----|---------|
| 34 | Gills                   | Untreated        | t0  | 67272   |
| 35 | Eye                     | Untreated        | t0  | 49882   |
| 36 | Skin                    | Untreated        | t0  | 130138  |
| 37 | Gills                   | Treated          | t0  | 193148  |
| 38 | Eye                     | Treated          | t0  | 246606  |
| 39 | Control mock sample     | Positive Control | /   | 201608  |
| 40 | Control mock sample     | Positive Control | /   | 58050   |
| 41 | Eye                     | Untreated        | t24 | 247488  |
| 42 | Gills                   | Untreated        | t24 | 53262   |
| 43 | Skin                    | Untreated        | t24 | 916836  |
| 44 | Eye                     | Treated          | t24 | 76604   |
| 45 | Eye                     | Treated          | t0  | <10000  |
| 46 | Skin                    | Treated          | t0  | 115034  |
| 47 | Gills                   | Treated          | t0  | 102370  |
| 48 | Eye                     | Untreated        | t0  | 49764   |
| 49 | Gills                   | Untreated        | t0  | 189860  |
| 50 | Skin                    | Untreated        | t0  | 178474  |
| 51 | Control mock sample     | Positive Control | /   | 149254  |
| 52 | Control negative sample | Negative Control | /   | <10000  |
| 53 | Gills                   | Treated          | t24 | 134350  |
| 54 | Skin                    | Treated          | t24 | <10000  |
| 55 | Eye                     | Treated          | t24 | 50378   |
| 56 | Eye                     | Untreated        | t24 | 84910   |
| 57 | Skin                    | Untreated        | t24 | <10000  |
| 58 | Gills                   | Untreated        | t24 | 99280   |
| 59 | Eye                     | Treated          | t24 | <10000  |
| 60 | Skin                    | Treated          | t24 | 138584  |
| 61 | Eye                     | Treated          | t24 | 196670  |
| 62 | Eye                     | Untreated        | t24 | <10000  |
| 63 | Gills                   | Untreated        | t0  | 1105720 |
| 64 | Skin                    | Untreated        | t0  | <10000  |
| 65 | Gills                   | Treated          | t24 | <10000  |
| 66 | Gills                   | Untreated        | t24 | 41010   |
| 67 | Eye                     | Untreated        | t0  | 5305538 |
| 68 | Skin                    | Treated          | t0  | 91992   |
| 70 | Skin                    | Untreated        | t24 | 396890  |
| 71 | Eye                     | Treated          | t0  | <10000  |
| 72 | Gills                   | Treated          | t0  | 84112   |
| 73 | Gills                   | Treated          | t24 | 167012  |
| 74 | Eye                     | Treated          | t24 | <10000  |
| 75 | Skin                    | Treated          | t24 | <10000  |
| 76 | Skin                    | Untreated        | t24 | 51212   |
| 77 | Eye                     | Untreated        | t24 | 62224   |
| 78 | Gills                   | Untreated        | t24 | 94124   |

Shifting from class to family level the abundances of the different taxonomic groups were reported as follows.

**Supplementary Table S1:** Abundances of the most represented taxonomic groups (families) considering all the analyzed sea bass samples.

| Family                 | Combined Abundance | Min | Max    | Mean    | Median |
|------------------------|--------------------|-----|--------|---------|--------|
| Pseudoalteromonadaceae | 181311             | 0   | 146715 | 2924.37 | 81.5   |
| Moraxellaceae          | 74089              | 0   | 19384  | 1194.98 | 83     |
| Comamonadaceae         | 73769              | 0   | 45743  | 1189.82 | 45     |
| Shewanellaceae         | 65167              | 0   | 33069  | 1051.08 | 35.5   |
| Flavobacteriaceae      | 28631              | 0   | 6119   | 461.79  | 25.5   |
| Vibrionaceae           | 13857              | 0   | 5361   | 223.5   | 1      |
| Xanthobacteraceae      | 4692               | 0   | 3118   | 75.68   | 1      |
| Propionibacteriaceae   | 3604               | 0   | 1747   | 58.13   | 1      |
| Pseudomonadaceae       | 2463               | 0   | 1027   | 39.72   | 1      |
| Corynebacteriaceae     | 2210               | 0   | 2108   | 35.64   | 0      |
| Moritellaceae          | 2125               | 0   | 1965   | 34.27   | 0      |
| Oxalobacteraceae       | 604                | 0   | 412    | 9.74    | 0      |
| Rhizobiaceae           | 575                | 0   | 571    | 9.27    | 0      |
| Micrococcaceae         | 328                | 0   | 142    | 5.29    | 0      |
| Carnobacteriaceae      | 267                | 0   | 117    | 4.31    | 0      |
| Psychromonadaceae      | 201                | 0   | 185    | 3.24    | 0      |
| Rhodobacteraceae       | 161                | 0   | 48     | 2.59    | 0      |
| Burkholderiaceae       | 136                | 0   | 92     | 2.19    | 0      |
| Weeksellaceae          | 110                | 0   | 52     | 1.77    | 0      |

**Supplementary Figure S1:** Graphical representation of family distribution among sampling times (3 hours and 24 hours after starting of experiment), tissues (gills, skin and eye respectively) and treatment applied (Cafodos or untreated controls).

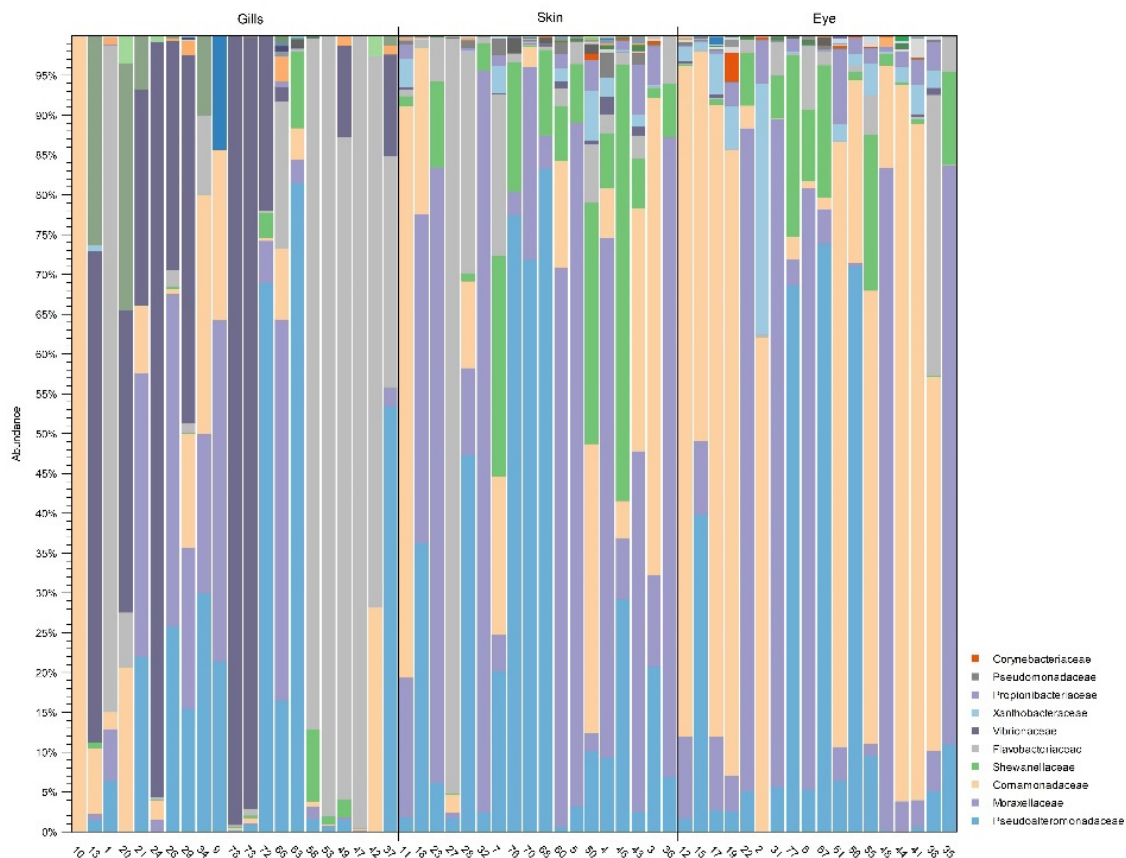

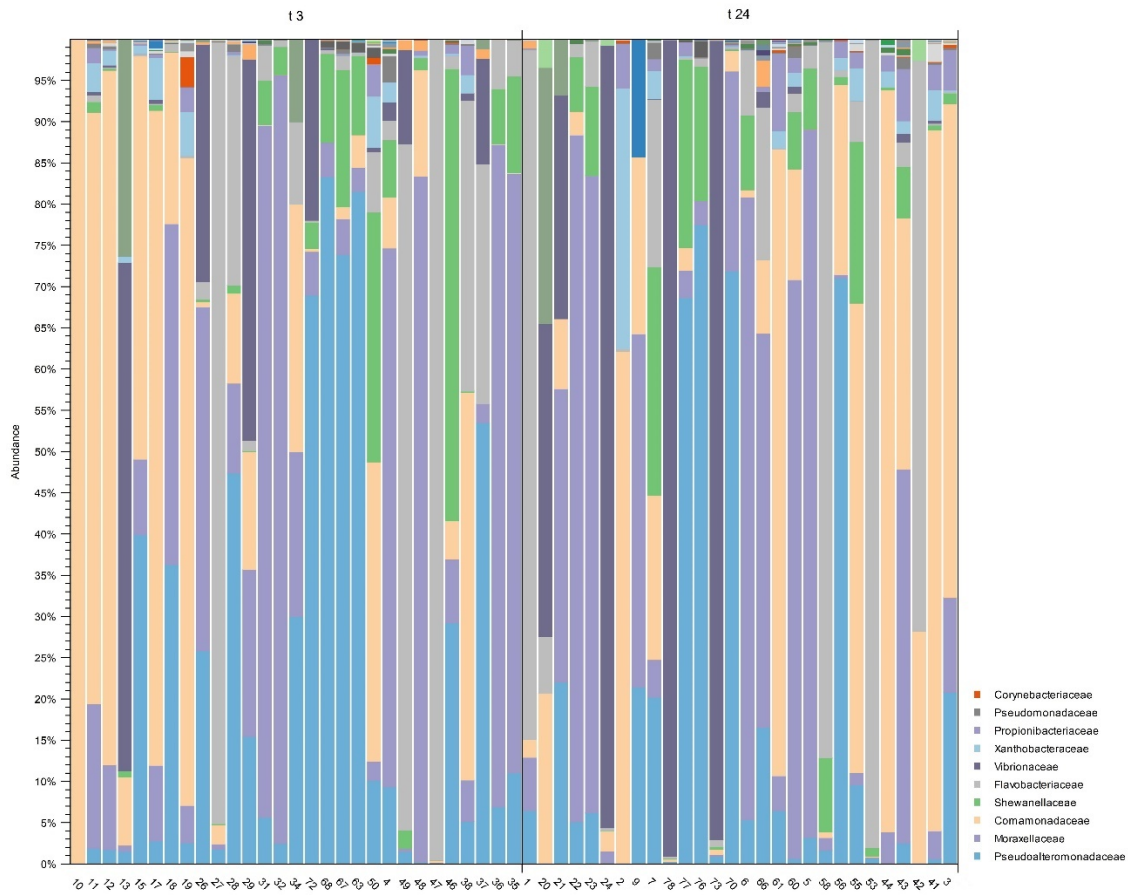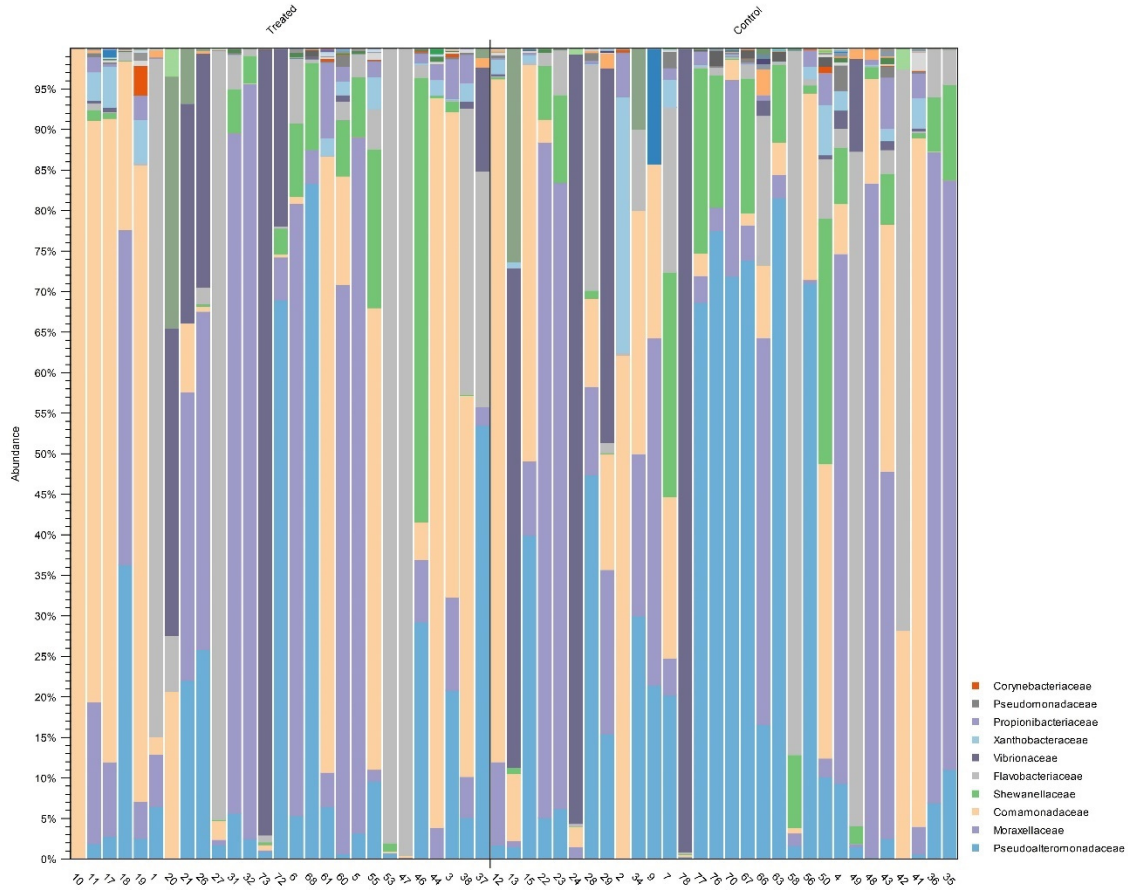

In the following figures and tables are reported all the comparisons made for Differential Abundance Analysis (DAA). For each comparisons is reported on the left an histogram on microbiome composition in the two compared groups, on the right alpha diversity analysis and related Krustal Wallis test). If according to DAA significant difference in comparisons made were recorded, a supplementary table with fold changes and FDR p values is reported.

- Controls specimens (3 hours stored on ice) VS Cafodos treated specimens (3 hours after exposure)

● Gills

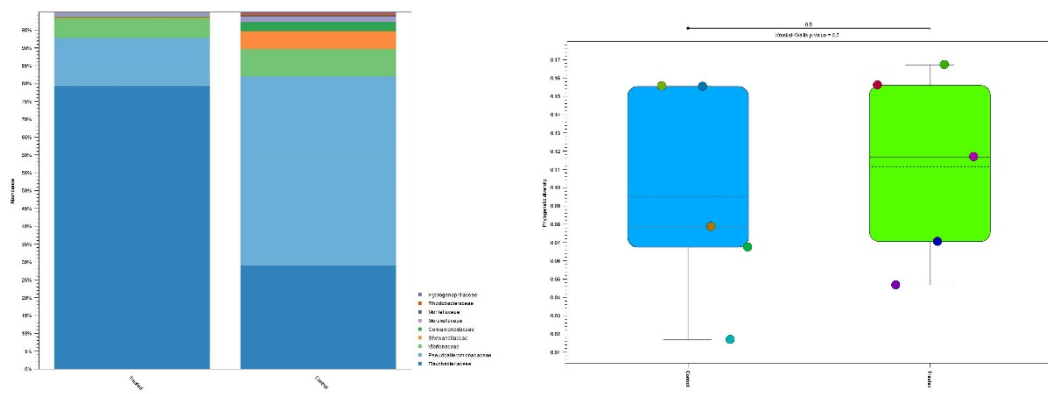

● Eye

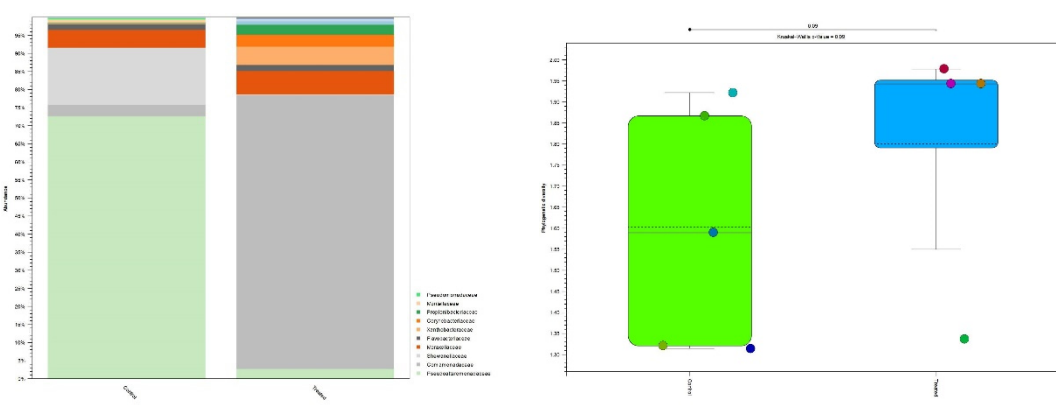

● Skin

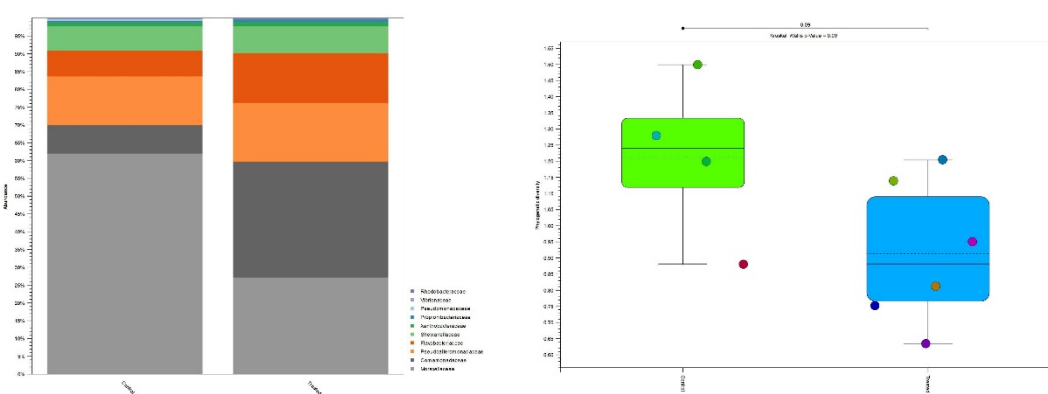

- Controls specimens (24 hours stored on ice) VS Cafodos treated specimens (24 hours after exposure)

• Gills

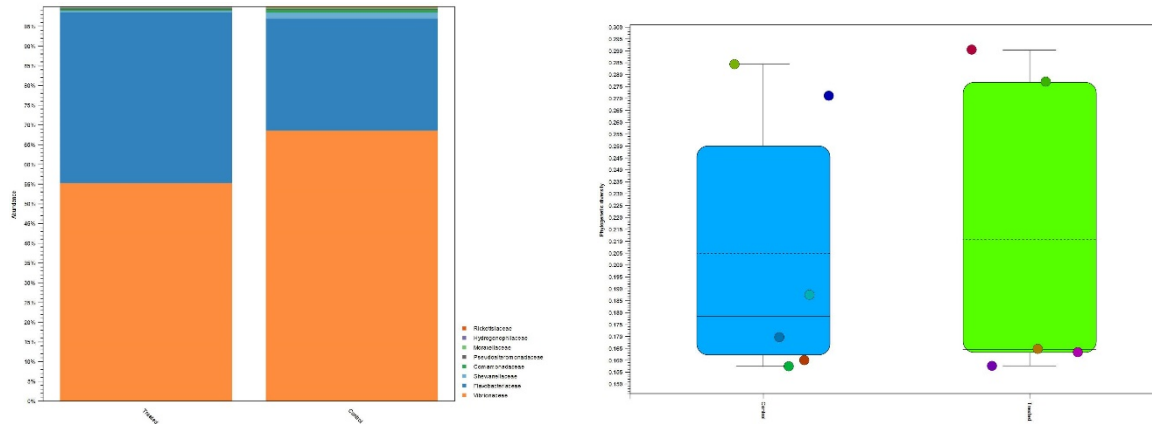

| Control VS Treated (24h) | Max group mean | Log <sub>2</sub> fold change | Fold change  | P-value     | FDR p-value |
|--------------------------|----------------|------------------------------|--------------|-------------|-------------|
| Hydrogenophilaceae       | 2.8            | -7.89268937                  | -237.6491399 | 0.004420086 | 0.03536069  |
| Flavobacteriaceae        | 839.8          | -0.417666481                 | -1.335765243 | 0.704051484 | 0.911303247 |
| Rickettsiaceae           | 2              | 1.620091522                  | 3.073945363  | 0.455728527 | 0.877692061 |
| Comamonadaceae           | 11.16666667    | 0.736531005                  | 1.666164686  | 0.547097254 | 0.877692061 |
| Pseudoalteromonadaceae   | 7              | -1.084595517                 | -2.120780805 | 0.510489774 | 0.877692061 |
| Shewanellaceae           | 25.33333333    | -1.260348653                 | -2.395536263 | 0.548557538 | 0.877692061 |
| Vibrionaceae             | 1118.333333    | 0.802455031                  | 1.744066477  | 0.797390341 | 0.911303247 |
| Moraxellaceae            | 5.333333333    | 0.018012269                  | 1.012563418  | 0.992635843 | 0.992635843 |

• Eye

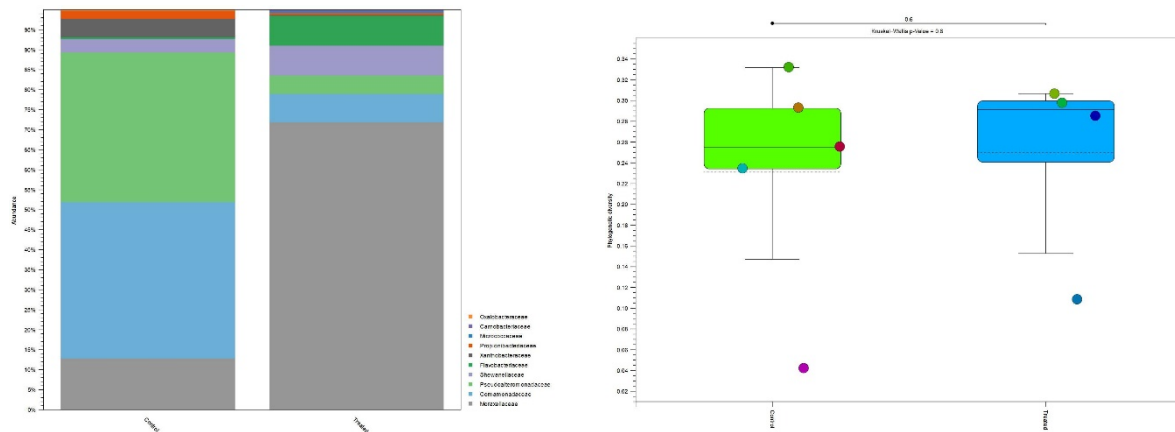

• Skin

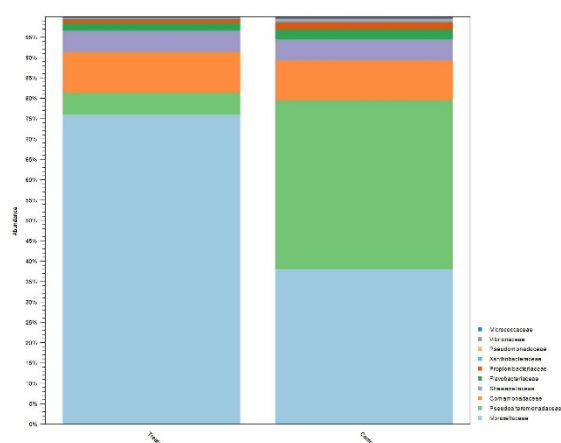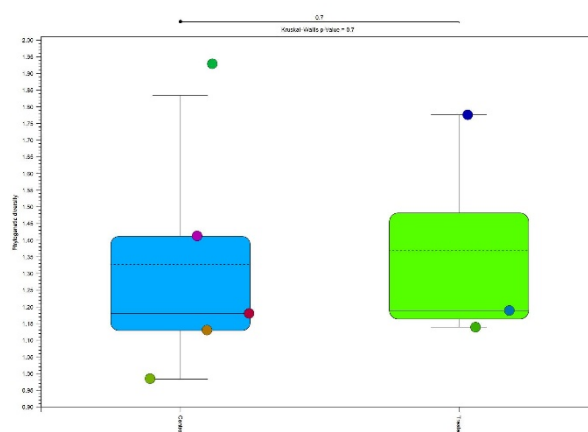

- Controls specimens (3 hours stored on ice) VS Cafodos treated specimens (3 hours after exposure). All specimens from each fish were aggregate (skin+gills+eye)

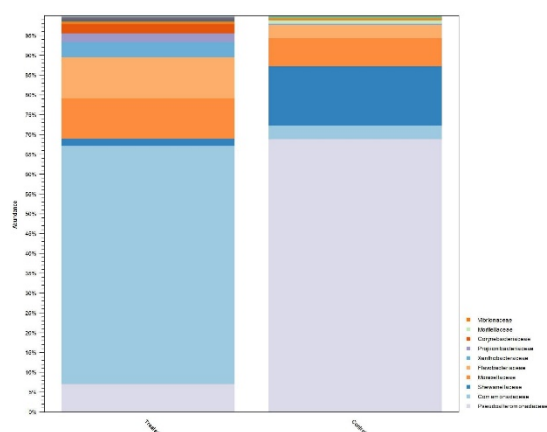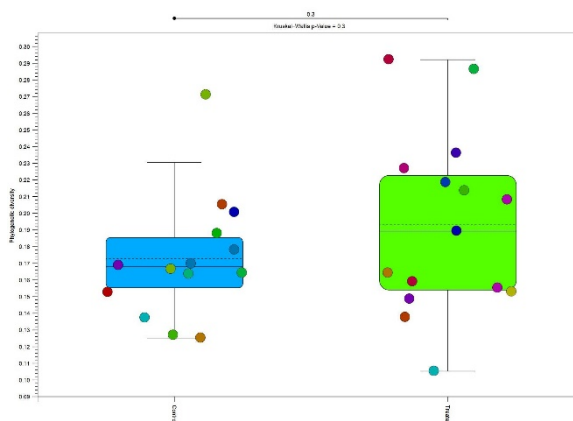

| Control VS Treated (3h) | Max group mean | Log <sub>2</sub> fold change | Fold change | P-value  | FDR p-value |
|-------------------------|----------------|------------------------------|-------------|----------|-------------|
| Rhizobiaceae            | 38.066667      | -8.431409                    | -345.228787 | 0.000833 | 0.011323    |
| Flavobacteriaceae       | 624.000000     | -4.416358                    | -21.352862  | 0.000871 | 0.011323    |
| Listeriaceae            | 1.357143       | -5.074122                    | -33.687054  | 0.003944 | 0.034179    |
| Hydrogenophilaceae      | 2.642857       | 4.803519                     | 27.925652   | 0.006260 | 0.040693    |
| Burkholderiaceae        | 6.133333       | -3.185048                    | -9.094837   | 0.009956 | 0.047598    |
| Sporolactobacillaceae   | 4.266667       | -5.603728                    | -48.628425  | 0.010984 | 0.047598    |
| Rhodobacteraceae        | 5.428571       | 2.941826                     | 7.683833    | 0.016759 | 0.056142    |
| Exiguobacteraceae       | 2.666667       | -5.063048                    | -33.429450  | 0.017275 | 0.056142    |
| Beijerinckiacae         | 1.266667       | -4.263308                    | -19.203638  | 0.032302 | 0.093318    |
| Chitinophagaceae        | 1.000000       | -4.024547                    | -16.274568  | 0.038424 | 0.095276    |
| Actinomycetaceae        | 0.733333       | -3.722579                    | -13.201029  | 0.047240 | 0.102353    |
| Corynebacteriaceae      | 140.600000     | -4.052705                    | -16.595324  | 0.040309 | 0.095276    |
| Micrococcaceae          | 0.714286       | 0.631453                     | 1.549124    | 0.562802 | 0.665130    |
| Propionibacteriaceae    | 130.066667     | -2.418898                    | -5.347623   | 0.094849 | 0.164404    |
| Acetobacteraceae        | 1.142857       | 2.164990                     | 4.484633    | 0.145368 | 0.222327    |
| Xanthobacteraceae       | 234.866667     | -1.849098                    | -3.602749   | 0.192466 | 0.263375    |
| Comamonadaceae          | 3631.666667    | -1.614465                    | -3.061981   | 0.157339 | 0.227267    |
| Oxalobacteraceae        | 27.933333      | -2.153734                    | -4.449780   | 0.104359 | 0.169583    |



|                        |              |           |           |          |          |
|------------------------|--------------|-----------|-----------|----------|----------|
| Aeromonadaceae         | 1.642857     | 3.170839  | 9.005704  | 0.085502 | 0.158790 |
| Moritellaceae          | 148.071429   | 2.762276  | 6.784655  | 0.082115 | 0.158790 |
| Pseudoalteromonadaceae | 11102.428571 | 0.298766  | 1.230092  | 0.675969 | 0.732300 |
| Psychromonadaceae      | 13.571429    | 0.933937  | 1.910482  | 0.462719 | 0.574396 |
| Shewanellaceae         | 2408.500000  | 0.334923  | 1.261310  | 0.741053 | 0.741053 |
| Vibrionaceae           | 64.357143    | 1.006676  | 2.009277  | 0.463935 | 0.574396 |
| Moraxellaceae          | 1137.642857  | -0.222317 | -1.166606 | 0.722984 | 0.741053 |
| Pseudomonadaceae       | 68.071429    | 0.589323  | 1.504540  | 0.606634 | 0.685760 |

- Controls specimens (24 hours stored on ice) VS Cafodos treated specimens (24 hours after exposure). All specimens from each fish were aggregate (skin+gills+eye)

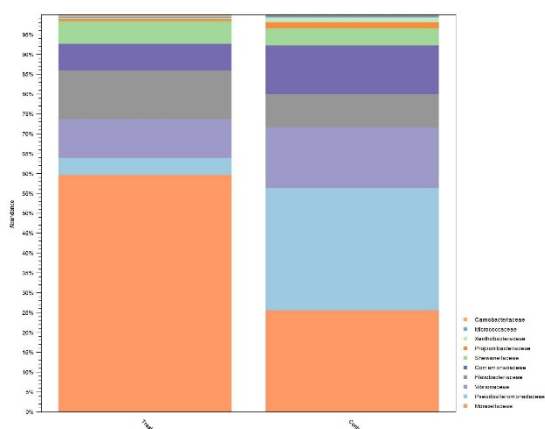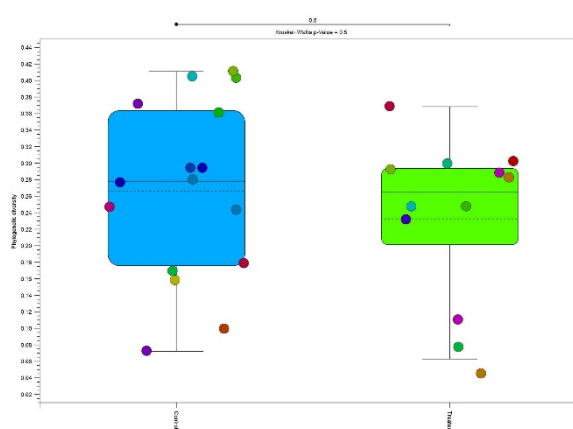

| Control VS Treated (24h)            | Max group mean | Log <sub>2</sub> fold change | Fold change | P-value  | FDR p-value |
|-------------------------------------|----------------|------------------------------|-------------|----------|-------------|
| Hydrogenophilaceae                  | 1.25           | -5.827594                    | -56.791147  | 0.000211 | 0.003369    |
| Oxalobacteraceae                    | 1.1875         | 4.502508                     | 22.666787   | 0.005762 | 0.0461      |
| Rickettsiaceae                      | 0.75           | 4.022073                     | 16.246675   | 0.012169 | 0.064901    |
| Flavobacteriaceae                   | 555.666667     | -2.9783                      | -7.880571   | 0.018659 | 0.074637    |
| {Unknown Family}                    | 2              | 4.023363                     | 16.26121    | 0.02648  | 0.084736    |
| Peptostreptococcales-Tissierellales |                |                              |             |          |             |
| Carnobacteriaceae                   | 10.75          | -2.224166                    | -4.672407   | 0.058551 | 0.156137    |
| Micrococcaceae                      | 15.25          | -0.72608                     | -1.654139   | 0.569966 | 0.839146    |
| Propionibacteriaceae                | 39.4375        | -0.754705                    | -1.687286   | 0.584451 | 0.839146    |
| Weeksellaceae                       | 3.0625         | 2.240837                     | 4.726713    | 0.132326 | 0.264652    |
| Xanthobacteraceae                   | 30.625         | 2.032886                     | 4.092228    | 0.11946  | 0.264652    |
| Comamonadaceae                      | 340.125        | 0.149266                     | 1.109005    | 0.896784 | 0.907903    |
| Pseudoalteromonadaceae              | 853.875        | 0.513703                     | 1.42771     | 0.64498  | 0.839146    |
| Shewanellaceae                      | 259.75         | -0.128076                    | -1.092835   | 0.907903 | 0.907903    |
| Vibrionaceae                        | 447.916667     | 1.160259                     | 2.234975    | 0.556153 | 0.839146    |
| Moraxellaceae                       | 2727.58333     | -0.447502                    | -1.363677   | 0.6842   | 0.839146    |
| Pseudomonadaceae                    | 3.75           | -0.40763                     | -1.326505   | 0.734253 | 0.839146    |

- *Gills*

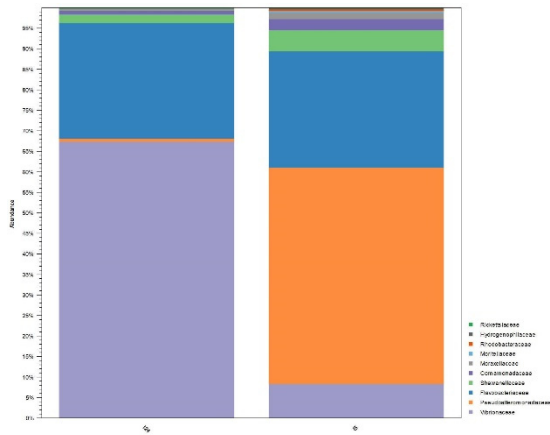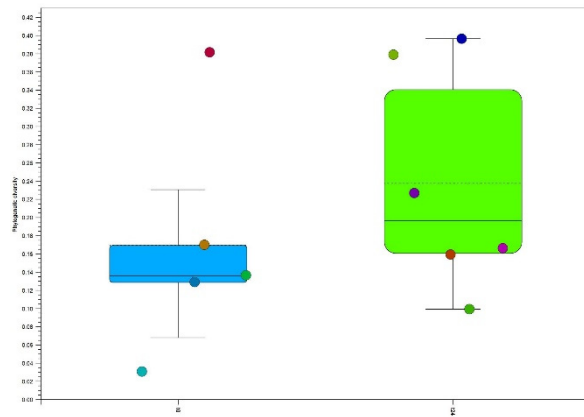

- *Eye*

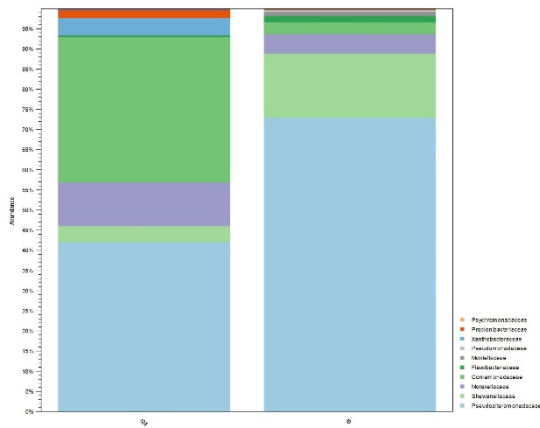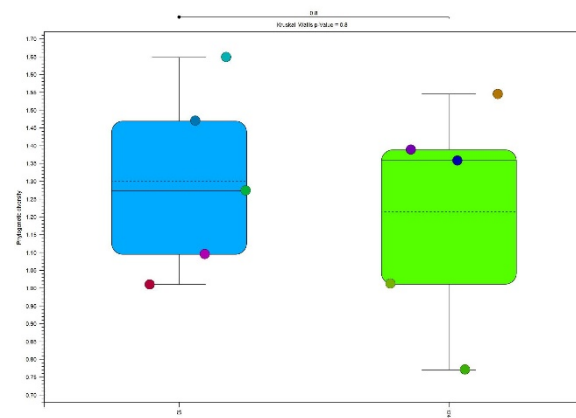

- *Skin*

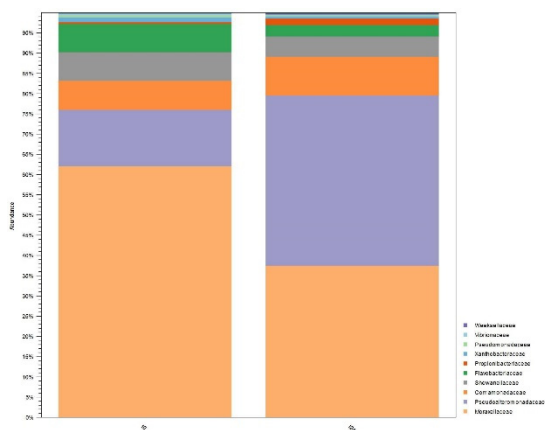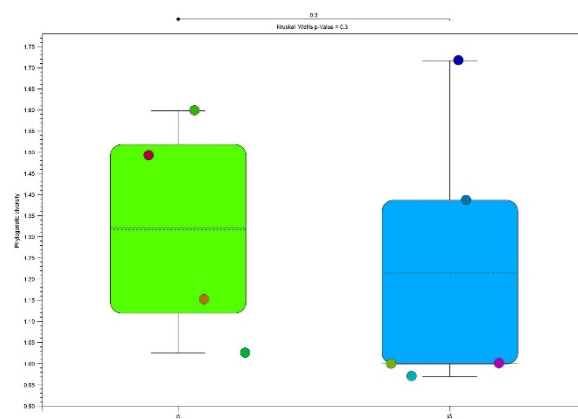

- *Cafodos* treated specimens (3 hours after exposure) VS *Cafodos* treated specimens (24 hours after exposure)

### • Gills

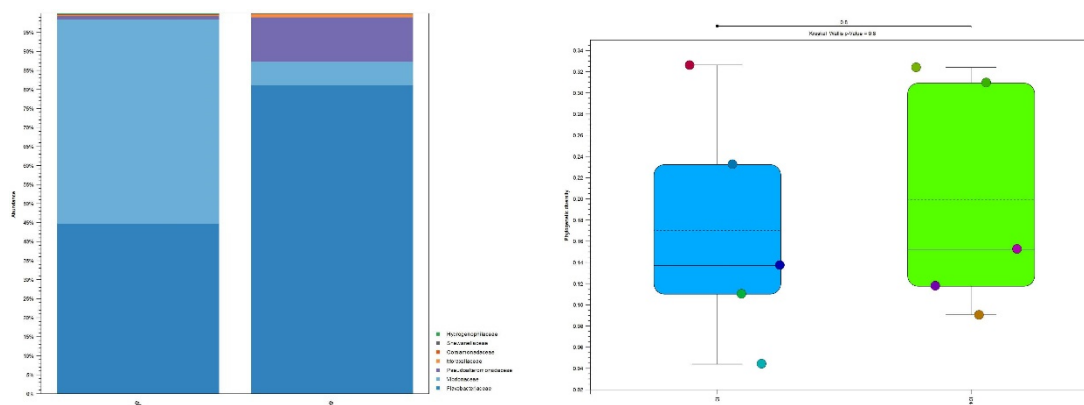

### • Eye

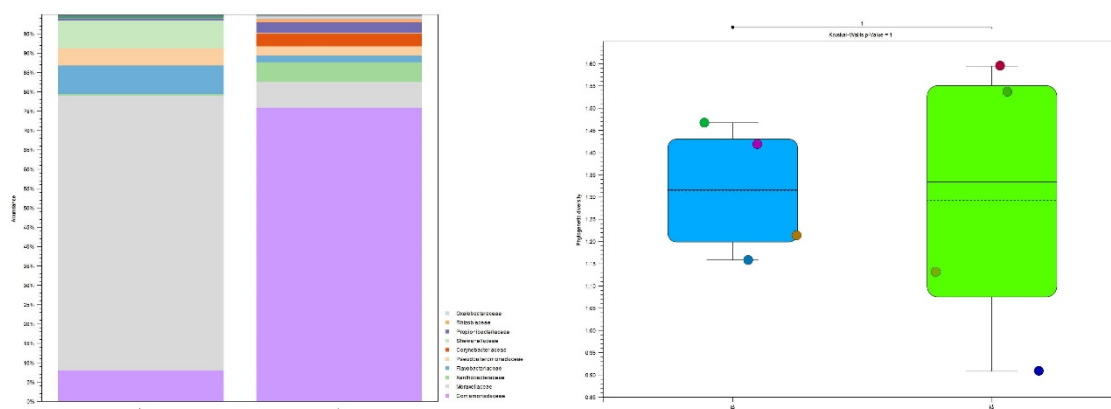

| Treated (3h) VS Treated (24h) | Max group mean | Log <sub>2</sub> fold change | Fold change | P-value | FDR p-value |
|-------------------------------|----------------|------------------------------|-------------|---------|-------------|
| Xanthobacteraceae             | 810.2500       | 6.2640                       | 76.8511     | 0.0000  | 0.0004      |
| Comamonadaceae                | 12065.7500     | 6.0533                       | 66.4100     | 0.0001  | 0.0013      |
| Oxalobacteraceae              | 103.0000       | 5.1912                       | 36.5359     | 0.0016  | 0.0092      |
| Burkholderiaceae              | 21.0000        | 4.1037                       | 17.1924     | 0.0017  | 0.0092      |
| Corynebacteriaceae            | 526.0000       | 9.2004                       | 588.2765    | 0.0041  | 0.0147      |
| Propionibacteriaceae          | 437.2500       | 3.9641                       | 15.6073     | 0.0042  | 0.0147      |
| Listeriaceae                  | 2.5000         | 11.0559                      | 2128.9845   | 0.0054  | 0.0161      |
| Rhizobiaceae                  | 142.7500       | 10.4288                      | 1378.4422   | 0.0089  | 0.0234      |
| Vibrionaceae                  | 4.2500         | 8.2503                       | 304.5008    | 0.0101  | 0.0235      |
| Sporolactobacillaceae         | 16.0000        | 7.7093                       | 209.2814    | 0.0291  | 0.0612      |
| Exiguobacteriaceae            | 10.0000        | 7.2045                       | 147.4944    | 0.0363  | 0.0694      |
| Actinomycetaceae              | 2.7500         | 5.9915                       | 63.6236     | 0.0600  | 0.0901      |
| Micrococcaceae                | 27.7500        | 0.5619                       | 1.4762      | 0.8789  | 0.9228      |
| Chitinophagaceae              | 3.7500         | 6.2375                       | 75.4552     | 0.0551  | 0.0891      |
| Flavobacteriaceae             | 462.2500       | 1.1037                       | 2.1491      | 0.6588  | 0.7344      |
| Carnobacteriaceae             | 20.5000        | -2.2987                      | -4.9200     | 0.3633  | 0.4768      |
| Beijerinckiaceae              | 4.7500         | 6.4554                       | 87.7538     | 0.0504  | 0.0882      |

|                        |           |        |        |        |        |
|------------------------|-----------|--------|--------|--------|--------|
| Pseudoalteromonadaceae | 381.7500  | 2.4748 | 5.5589 | 0.1399 | 0.1959 |
| Shewanellaceae         | 454.5000  | 0.0472 | 1.0333 | 0.9862 | 0.9862 |
| Moraxellaceae          | 4445.2500 | 1.4483 | 2.7288 | 0.4925 | 0.6084 |
| Pseudomonadaceae       | 3.0000    | 1.1804 | 2.2664 | 0.6645 | 0.7344 |

● *Skin*

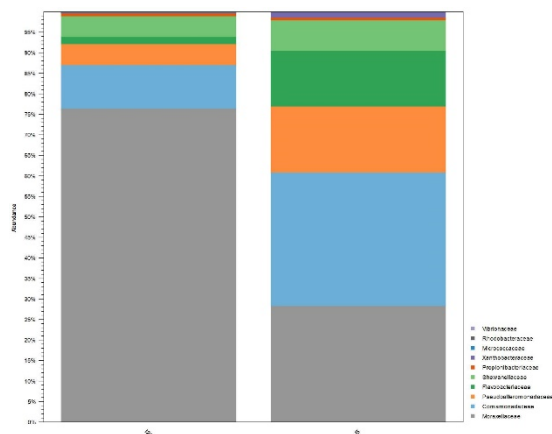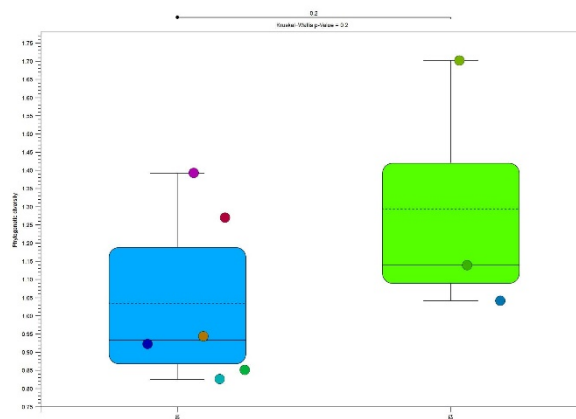

| Treated (3h) VS Treated (24h) | Max group mean | Log <sub>2</sub> fold change | Fold change | P-value | FDR p-value |
|-------------------------------|----------------|------------------------------|-------------|---------|-------------|
| Flavobacteriaceae             | 350.0000       | 6.5285                       | 92.3130     | 0.0039  | 0.0228      |
| Pseudoalteromonadaceae        | 416.0000       | 3.2172                       | 9.3001      | 0.0042  | 0.0228      |
| Micrococcaceae                | 6.6667         | -2.2465                      | -4.7452     | 0.2057  | 0.4526      |
| Propionibacteriaceae          | 40.3333        | 0.6018                       | 1.5176      | 0.8063  | 0.8063      |
| Xanthobacteraceae             | 31.6667        | 2.2226                       | 4.6674      | 0.4315  | 0.6780      |
| Rhodobacteraceae              | 2.1667         | 3.4187                       | 10.6938     | 0.1347  | 0.4086      |
| Comamonadaceae                | 840.1667       | 2.3375                       | 5.0544      | 0.2916  | 0.5345      |
| Shewanellaceae                | 279.6667       | 2.8992                       | 7.4600      | 0.1486  | 0.4086      |
| Vibrionaceae                  | 1.6667         | 1.6296                       | 3.0942      | 0.5064  | 0.6964      |
| Moraxellaceae                 | 4230.3333      | -0.5983                      | -1.5139     | 0.6286  | 0.7586      |
| Pseudomonadaceae              | 2.6667         | -0.7311                      | -1.6599     | 0.6897  | 0.7586      |
